# Supplementary material for: Reducing the hydrogen transfer barrier by the introduction of Ru via a constructed Ir–Ru–WO 2.72 bridge for highly CO-tolerant hydrogen oxidation
Source: Royal Society of Chemistry journal article supplement (doi:10.1039/d4ta04696j), 2024-01-01
Supplement: d4ta04696j1.pdf [file d4ta04696j1.pdf]

**Reducing the hydrogen transfer barrier by introduction of Ru *via* constructed Ir-Ru-WO<sub>2.72</sub> bridge for highly CO-tolerant hydrogen oxidation**

Xu Yu<sup>1,2,#</sup>, Han Tian<sup>1,#</sup>, Ziyi Yu<sup>1</sup>, Fantao Kong<sup>1</sup>, Chang Chen<sup>1,2</sup>, Ziwei Chang<sup>4</sup>, Jian Huang<sup>1</sup>, Xiangzhi Cui<sup>1,2,3 \*</sup>, Jianlin Shi<sup>1,2</sup>

<sup>1</sup> Shanghai Institute of Ceramics, Chinese Academy of Sciences, Shanghai 200050, PR China

<sup>2</sup> Center of Materials Science and Optoelectronics Engineering, University of Chinese Academy of Sciences, Beijing 100049, PR China

<sup>3</sup> School of Chemistry and Materials Science, Hangzhou Institute for Advanced Study, University of Chinese Academy of Sciences, Hangzhou 310024, PR China

<sup>4</sup> School of Physical Science and Technology, Shanghai Tech University, Shanghai 201210, PR China

\*Email: cuixz@mail.sic.ac.cn

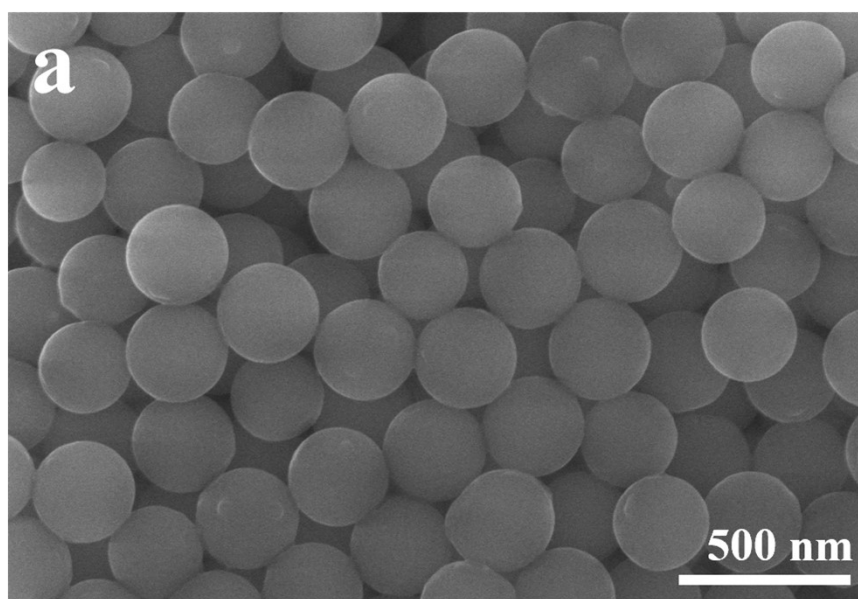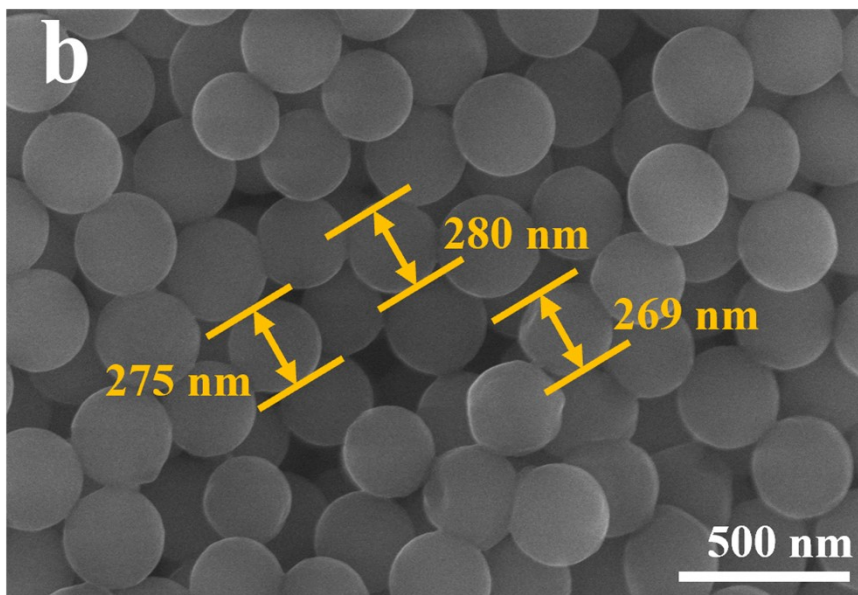

**Figure S1.** (a-b) SEM images of PS template.

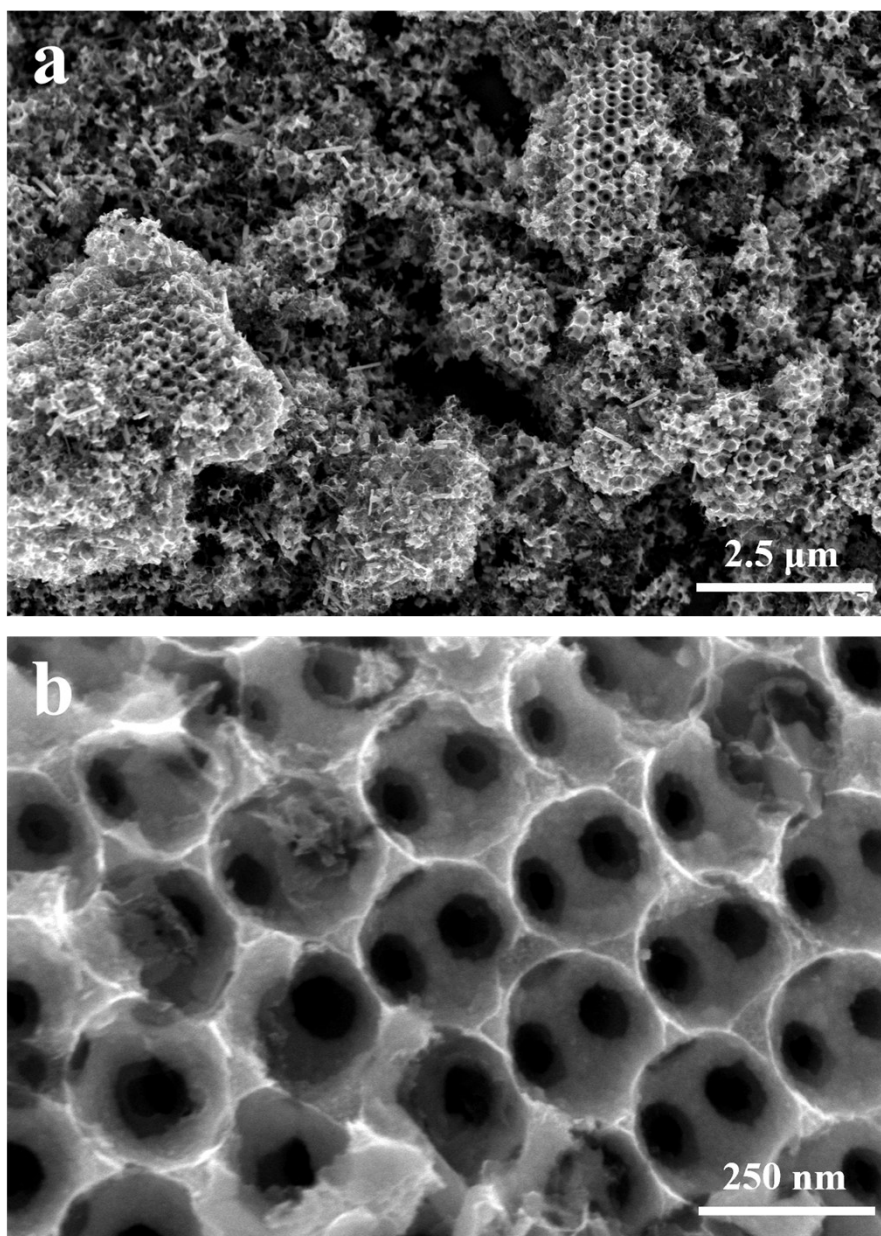

**Figure S2.** (a-b) SEM images of  $\text{WO}_{2.72}\text{-C}$  at different magnifications.

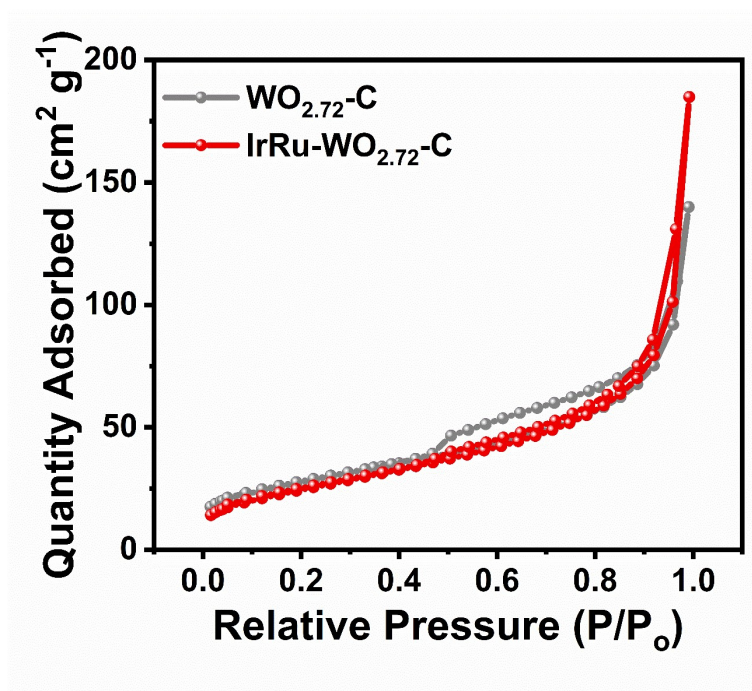

**Figure S3.** N<sub>2</sub> adsorption-desorption isotherms of WO<sub>2.72</sub>-C and IrRu-WO<sub>2.72</sub>-C.



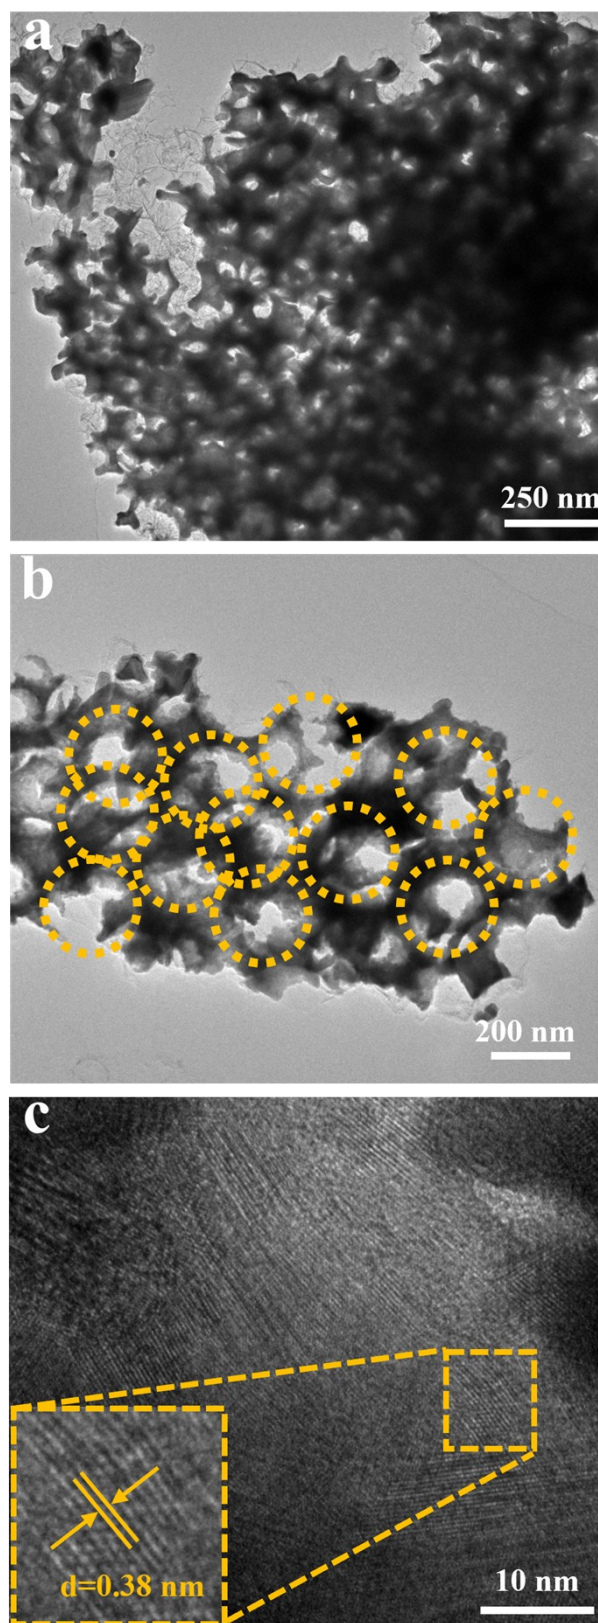

**Figure S4.** (a-b) TEM images of  $\text{WO}_{2.72}\text{-C}$  at different magnifications and the corresponding (c) HRTEM images. The  $d \approx 0.38$  nm is assigned to the (010) plane of monoclinic  $\text{WO}_{2.72}$ .

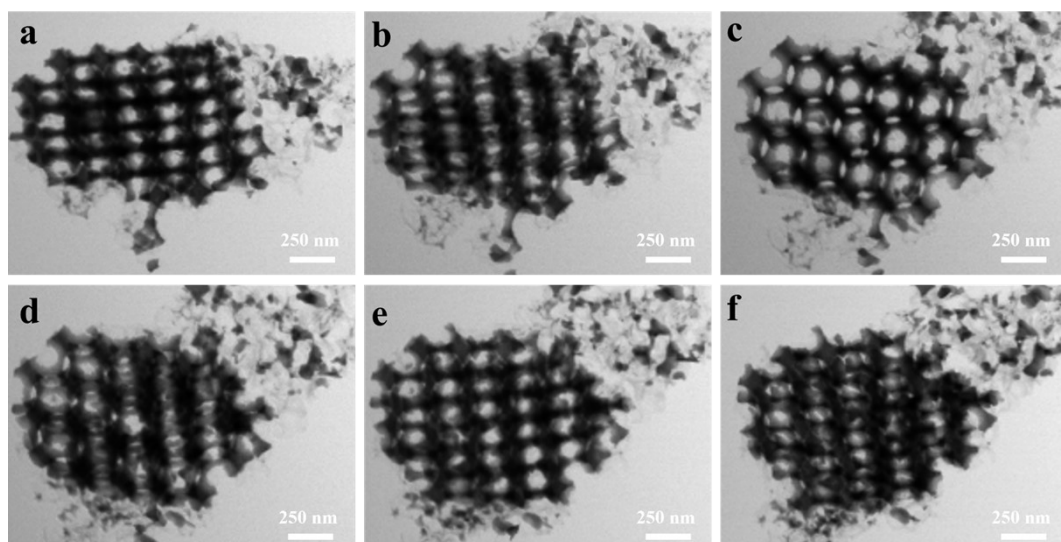

**Figure S5.** (a-d) Bright field (BF) STEM images of WO<sub>2.72</sub>-C at different angles,

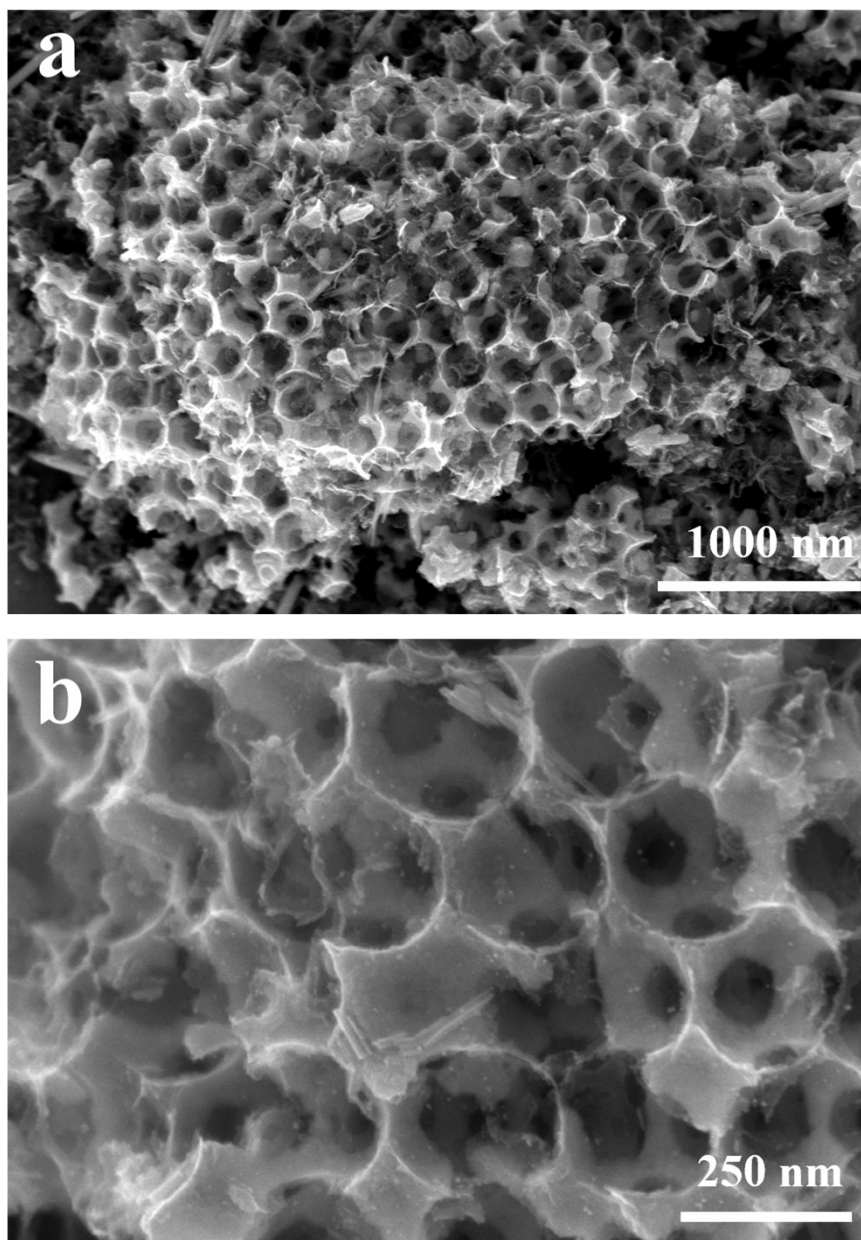

**Figure S6.** (a-d) SEM images of IrRu-WO<sub>2.72</sub>-C at different magnifications.

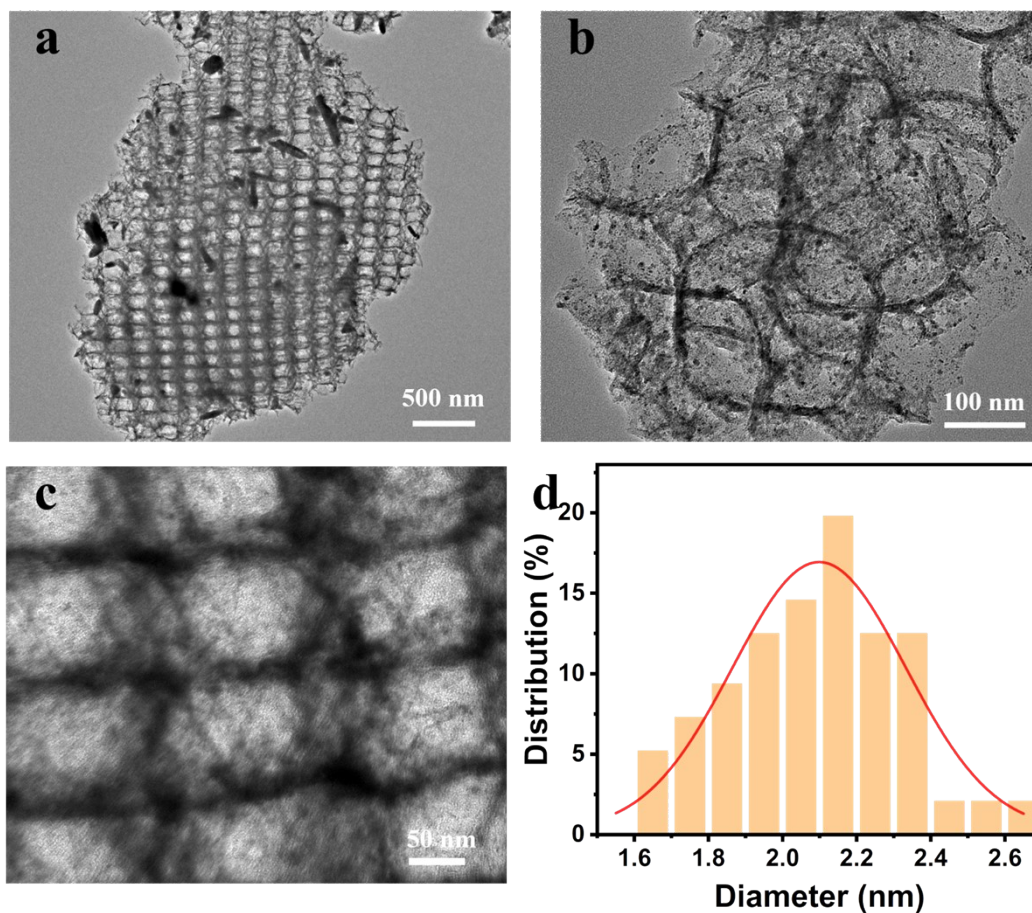

**Figure S7.** (a-c) TEM images of IrRu-WO<sub>2.72</sub>-C at different magnifications. (d) The size distribution histograms of IrRu alloy clusters for IrRu-WO<sub>2.72</sub>-C.



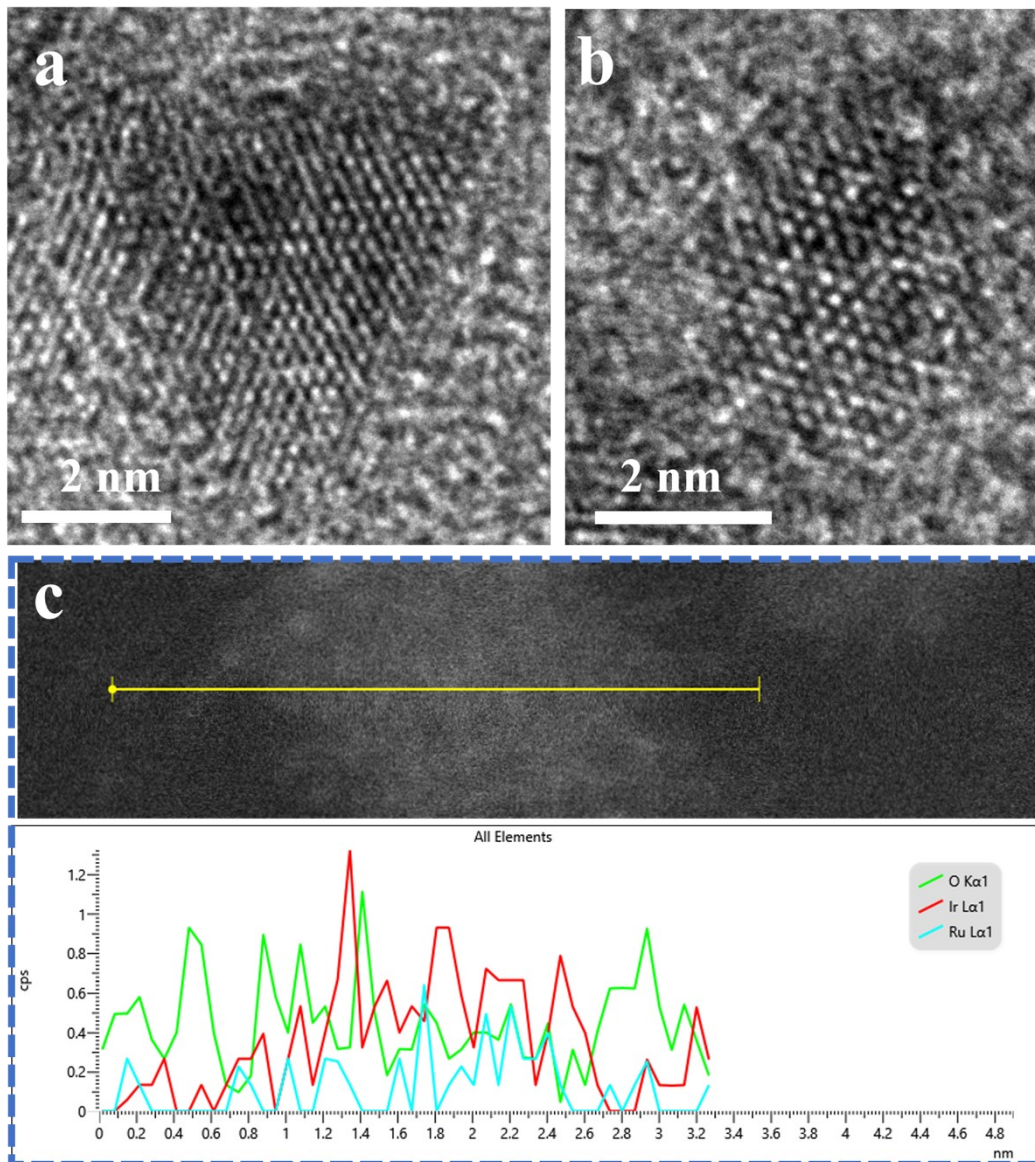

**Figure S8.** AC HAADF-STEM images (a, b) and liner elemental scanning profiles of IrRu clusters (c).

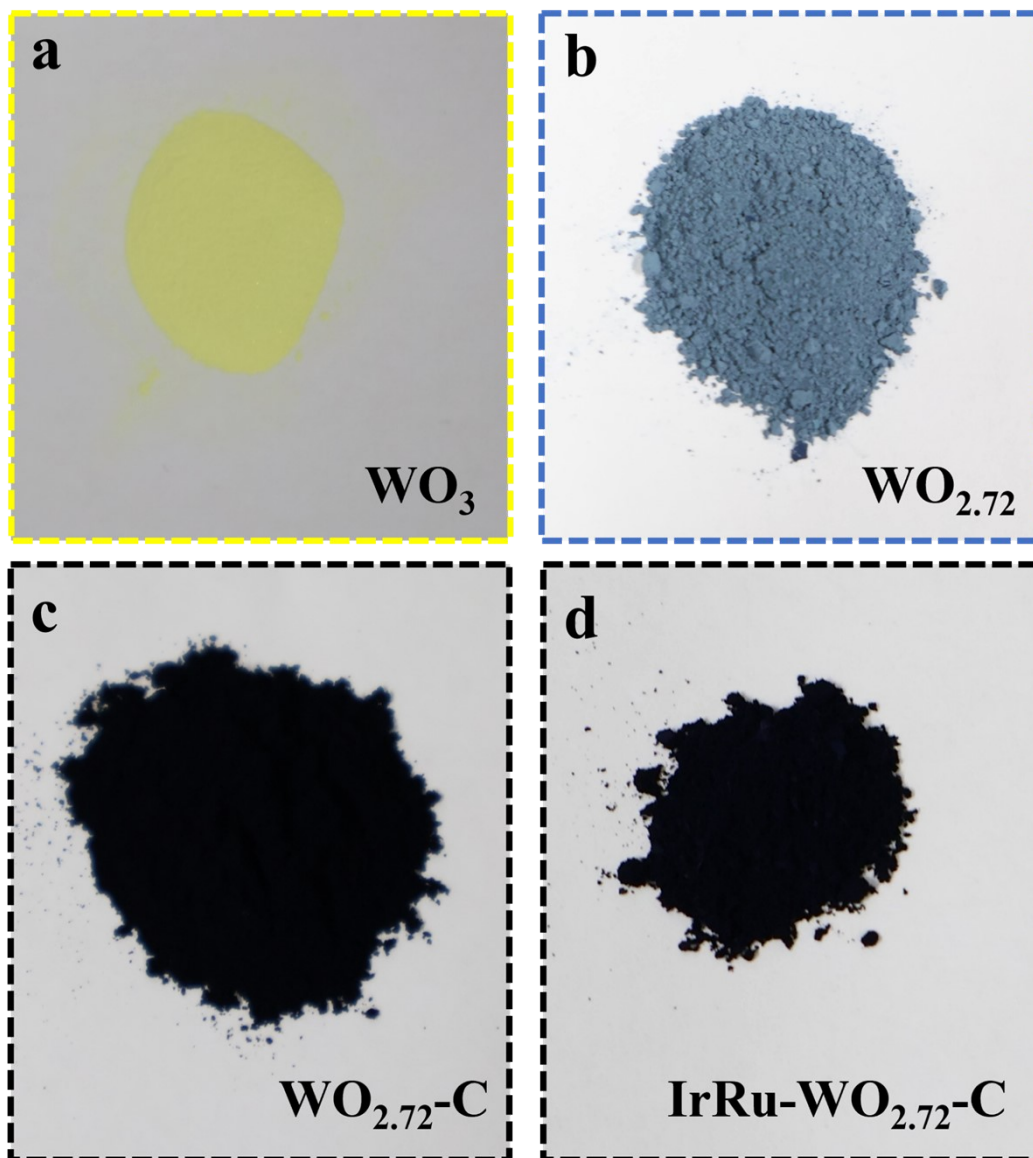

**Figure S9.** Digital photos of (a)  $\text{WO}_3$ , (b)  $\text{WO}_{2.72}$ , (c)  $\text{WO}_{2.72}\text{-C}$  and (d)  $\text{IrRu-WO}_{2.72}\text{-C}$ .

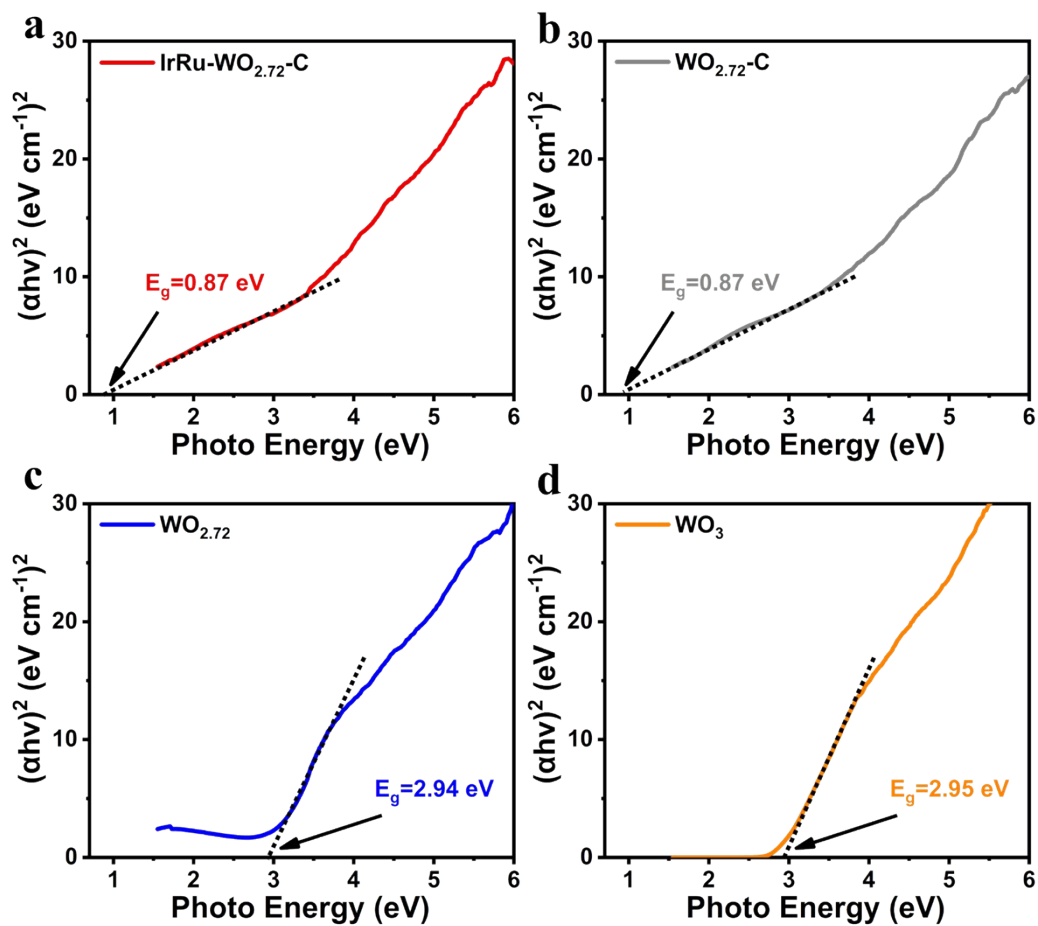

**Figure S10.** The Tauc plots of UV-vis spectra for (a) IrRu-WO<sub>2.72</sub>-C, (b) WO<sub>2.72</sub>-C, (c) WO<sub>2.72</sub> and (d) WO<sub>3</sub>.



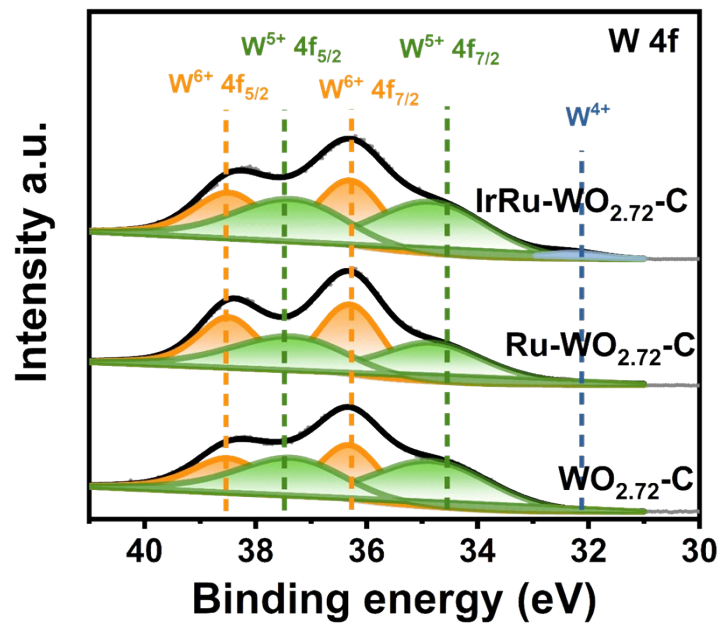

**Figure S11.** High-resolution XPS spectra of W 4f for IrRu-WO<sub>2.72</sub>-C, Ru-WO<sub>2.72</sub>-C and WO<sub>2.72</sub>-C.

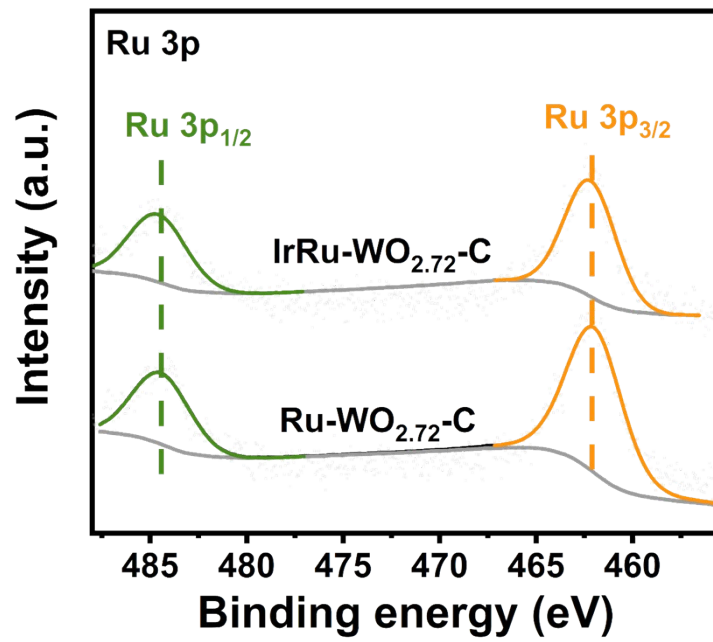

**Figure S12.** High-resolution XPS spectra of Ru 3p for IrRu-WO<sub>2.72</sub>-C and Ru-WO<sub>2.72</sub>-C.

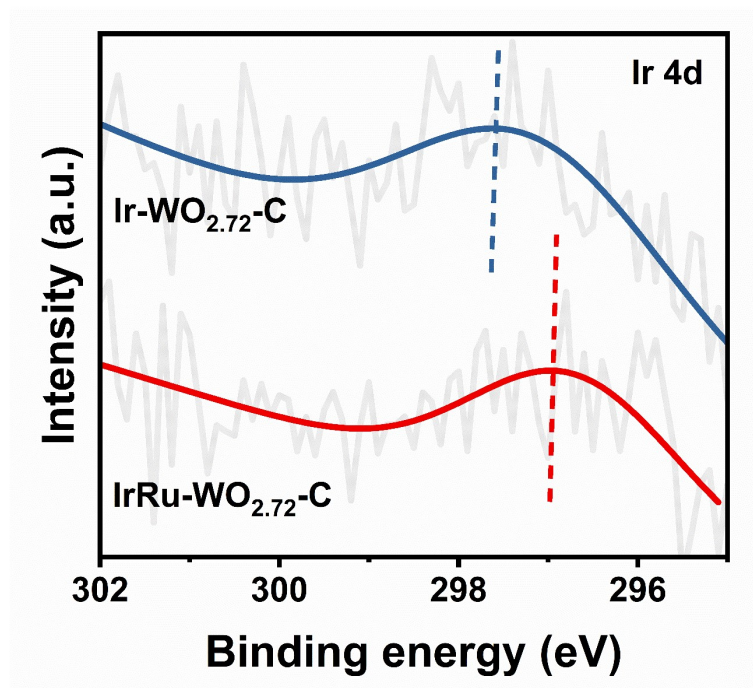

**Figure S13.** High-resolution XPS spectra of Ir 4d for IrRu-WO<sub>2.72</sub>-C and Ir-WO<sub>2.72</sub>-C.

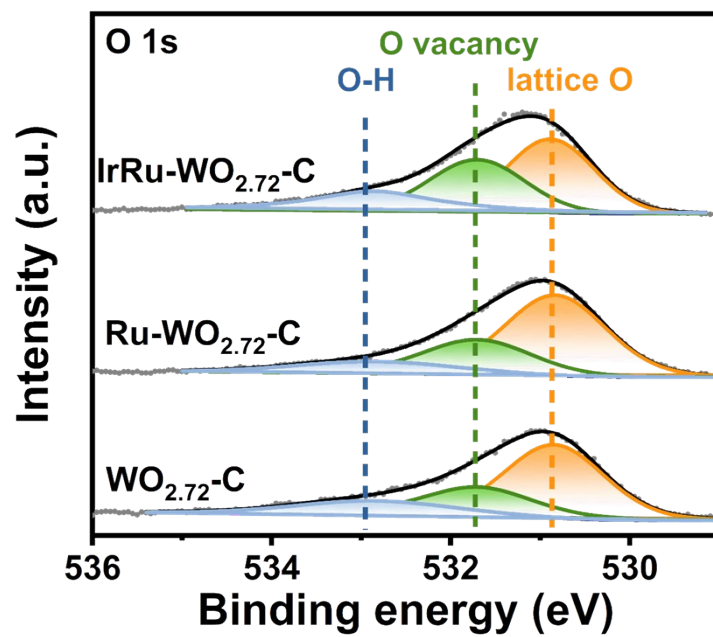

**Figure S14.** High-resolution XPS spectra of O 1s for IrRu-WO<sub>2.72</sub>-C, Ru-WO<sub>2.72</sub>-C and WO<sub>2.72</sub>-C.

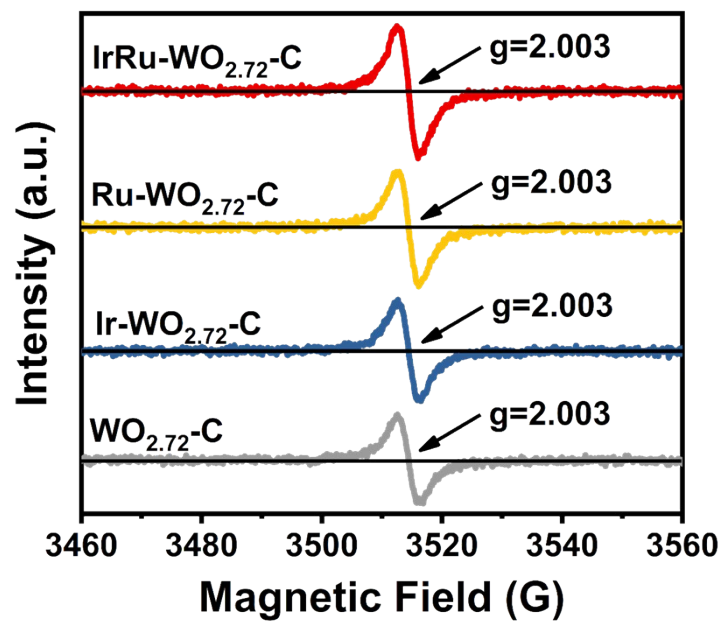

**Figure S15.** ESR spectra of IrRu-WO<sub>2.72</sub>-C, Ir-WO<sub>2.72</sub>-C, Ru-WO<sub>2.72</sub>-C and WO<sub>2.72</sub>-C.

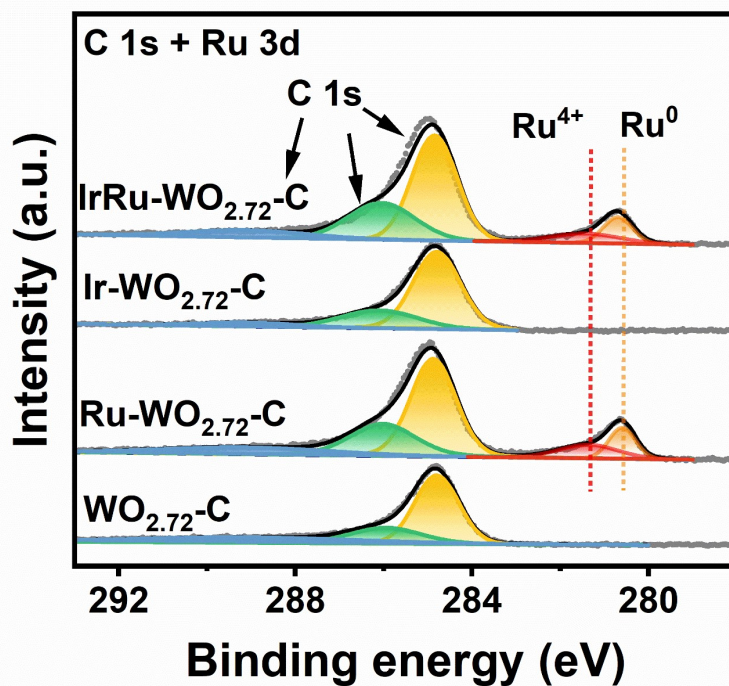

**Figure S16.** High-resolution XPS spectra of C 1s and Ru 3d for IrRu-WO<sub>2.72</sub>-C, Ir-WO<sub>2.72</sub>-C, Ru-WO<sub>2.72</sub>-C and WO<sub>2.72</sub>-C.

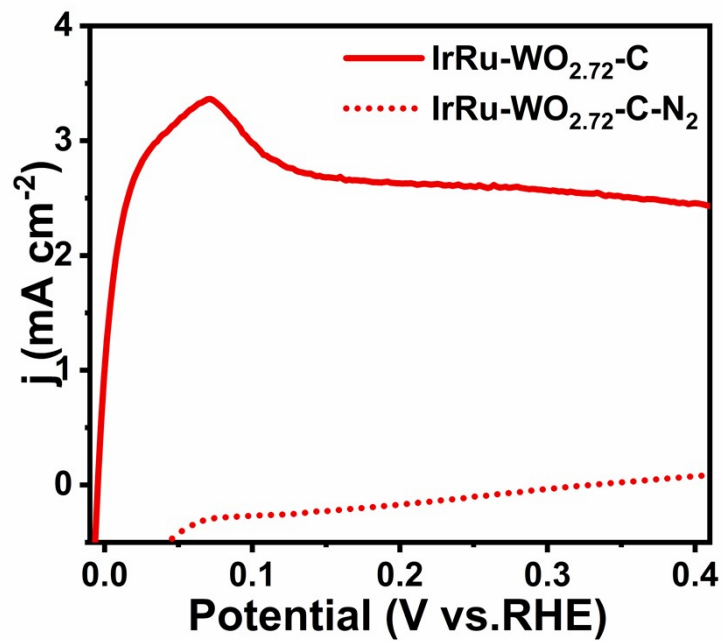

**Figure S17.** HOR polarization curves of IrRu-WO<sub>2.72</sub>-C in N<sub>2</sub> or H<sub>2</sub> saturated 0.5 M H<sub>2</sub>SO<sub>4</sub>.



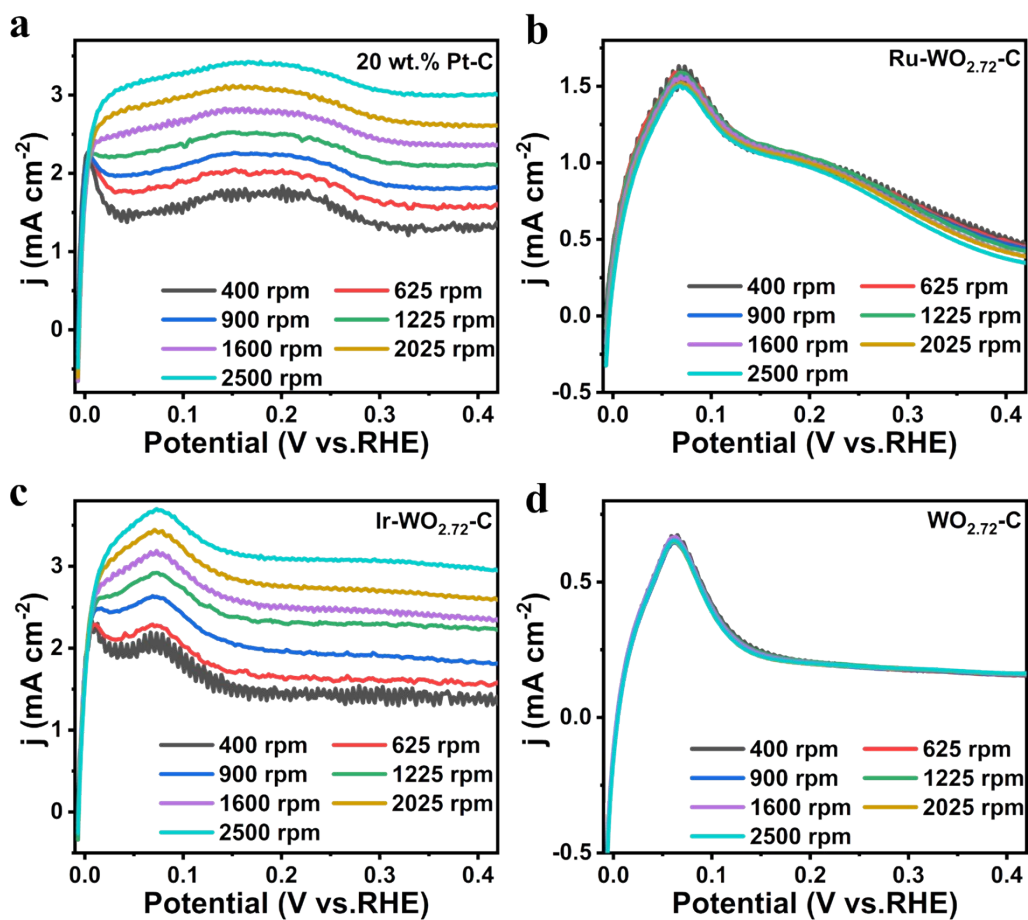

**Figure S18.** HOR polarization curves of (a) 20 wt.% Pt/C, (b) Ru-WO<sub>2.72</sub>-C, (c) Ir-WO<sub>2.72</sub>-C and (d) WO<sub>2.72</sub>-C at different rotating speeds.

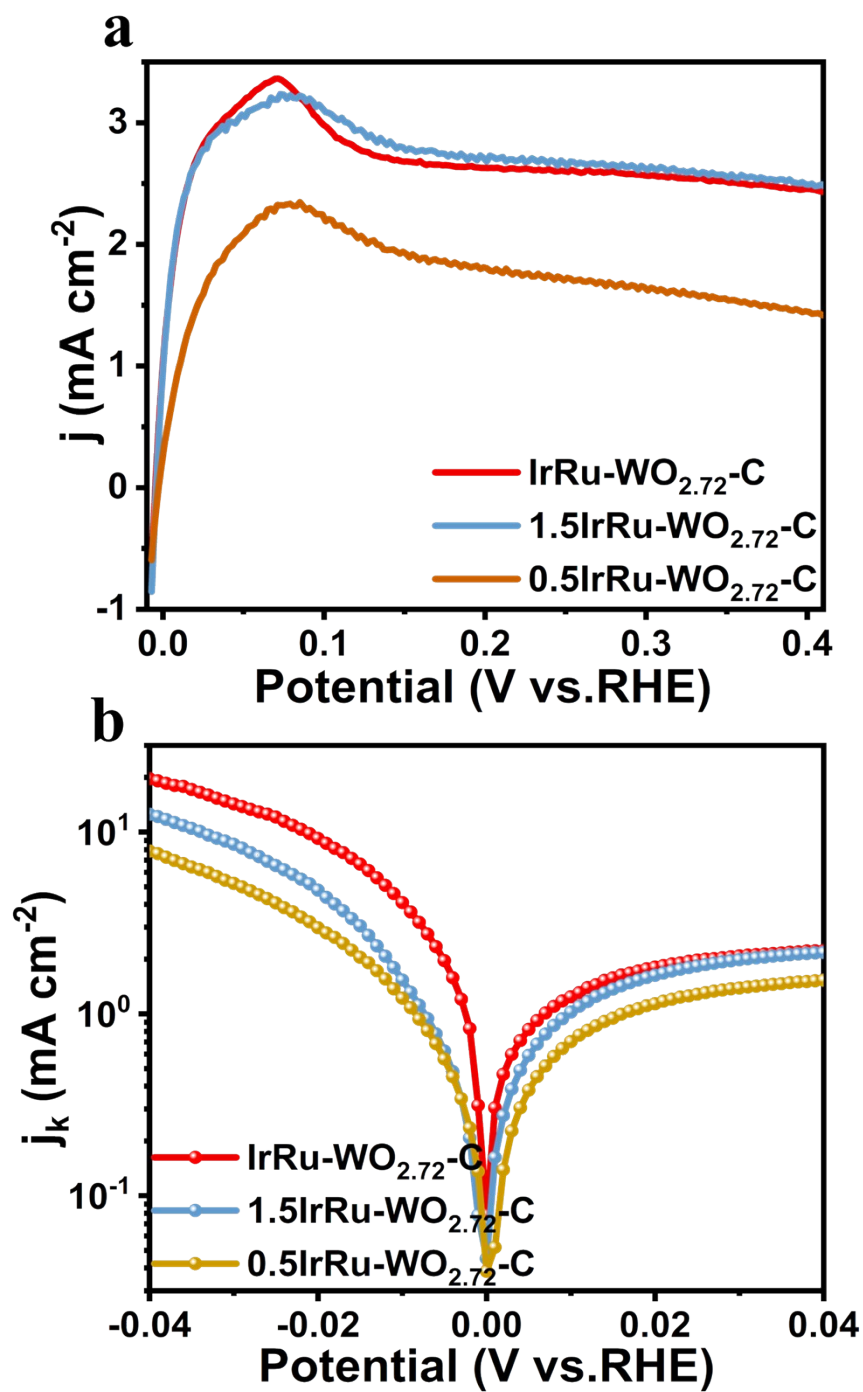

**Figure S19.** HOR polarization curves (a) and Tafel plots of kinetic current densities (b) for IrRu-WO<sub>2.72</sub>-C, 0.5 IrRu-WO<sub>2.72</sub>-C and 1.5 IrRu-WO<sub>2.72</sub>-C.

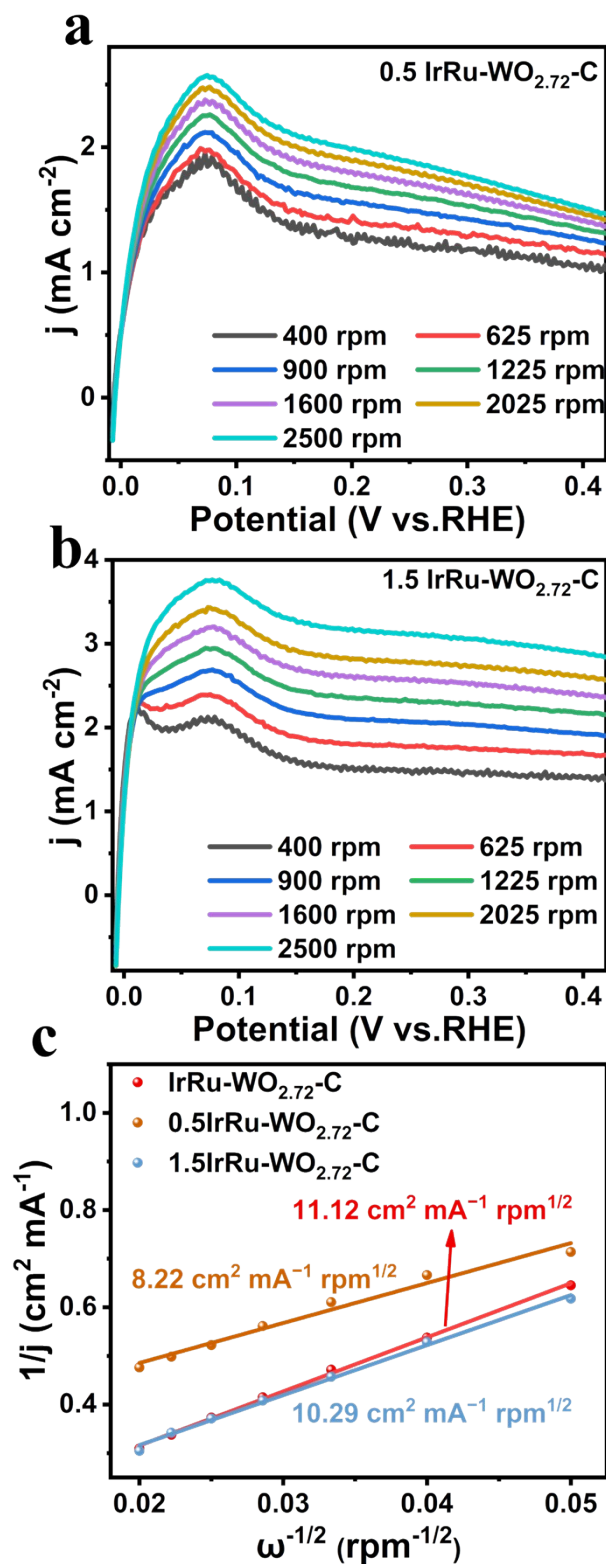

**Figure S20.** HOR polarization curves of (a) 0.5 IrRu-WO<sub>2.72</sub>-C and (b) 1.5 IrRu-WO<sub>2.72</sub>-C at different rotating speeds. (c) Koutecky–Levich plots of the catalysts at 0.15 V vs RHE.

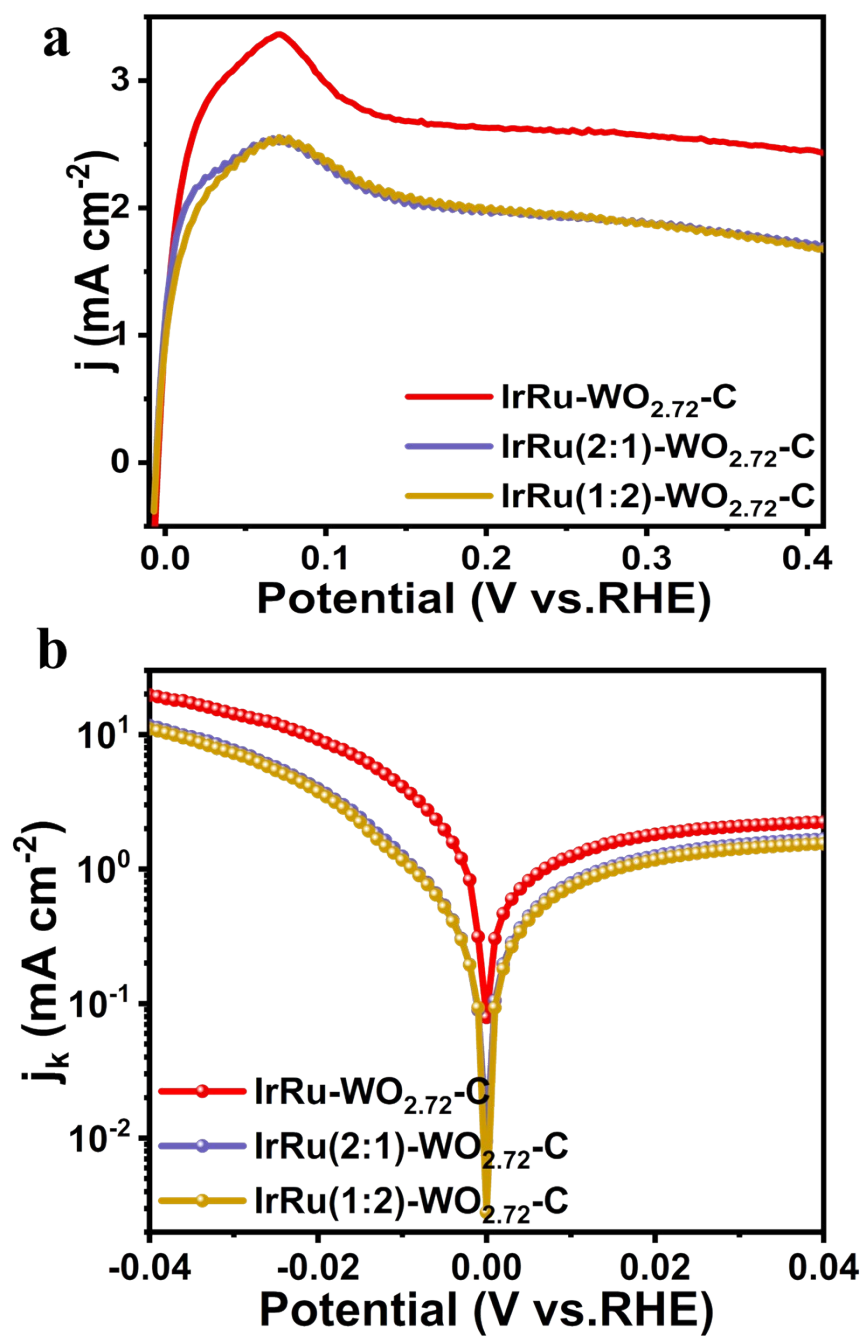

**Figure S21.** HOR polarization curves (a) and Tafel plots of kinetic current densities (b)

for IrRu-WO<sub>2.72</sub>-C, IrRu(2:1)-WO<sub>2.72</sub>-C and IrRu(1:2)-WO<sub>2.72</sub>-C.

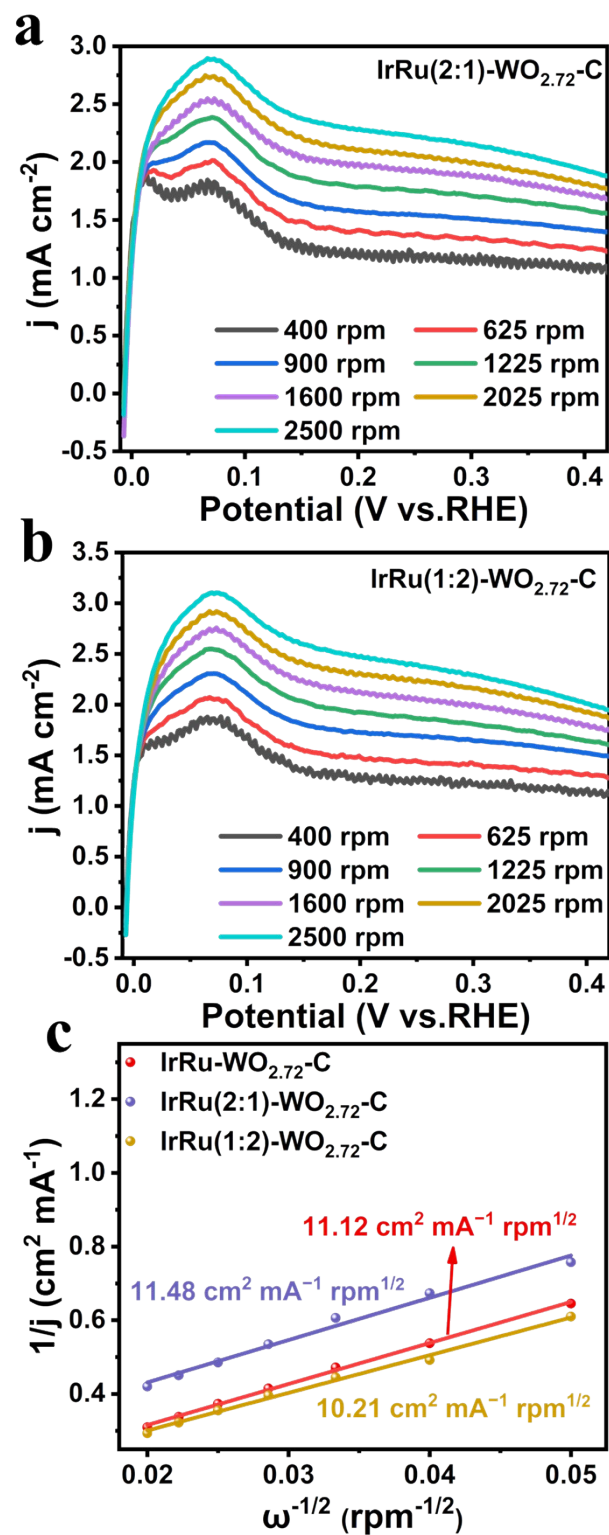

**Figure S22.** HOR polarization curves of (a) IrRu(2:1)-WO<sub>2.72</sub>-C and (b) IrRu(1:2)-WO<sub>2.72</sub>-C at different rotating speeds. (c) Koutecky-Levich plots of the catalysts at 0.15 V vs. RHE.

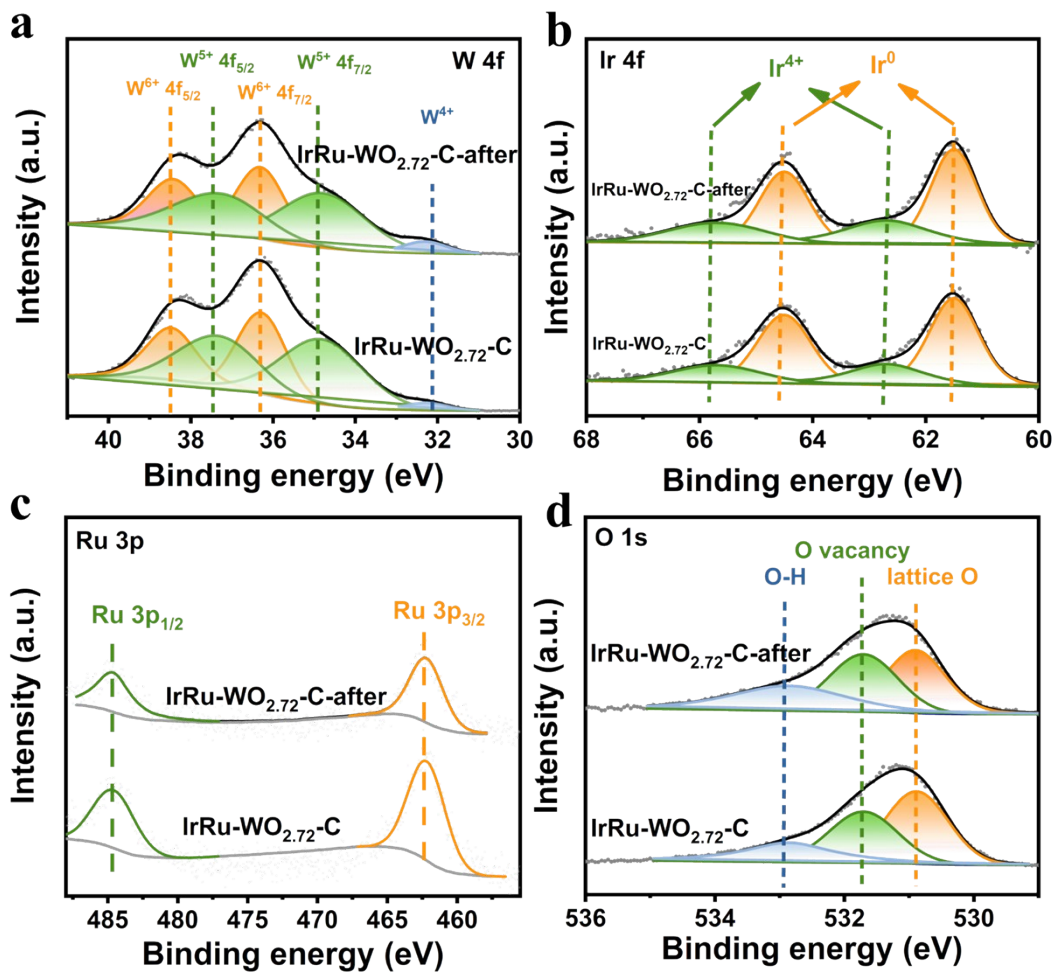

**Figure S23.** High-resolution XPS spectra of W 4f (a), Ir 4f (b), Ru 3p (c) and O 1s (d)

for IrRu-WO<sub>2.72</sub>-C and after stability test named as IrRu-WO<sub>2.72</sub>-C-after.

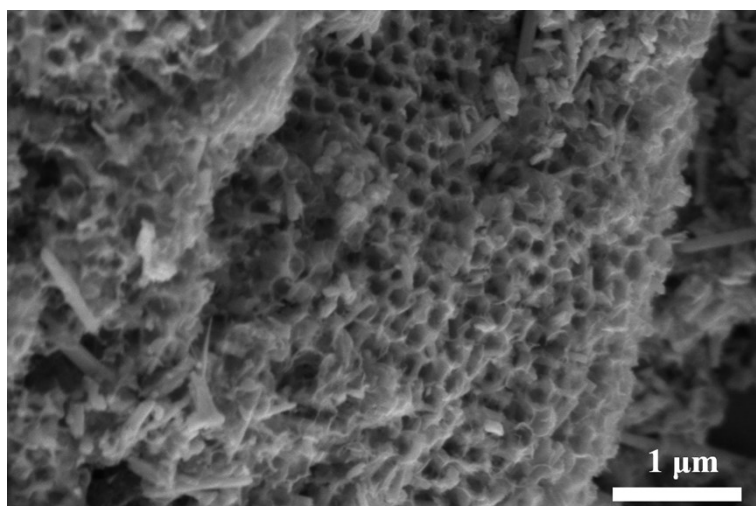

**Figure S24.** SEM image of IrRu-WO<sub>2.72</sub>-C after stability test.



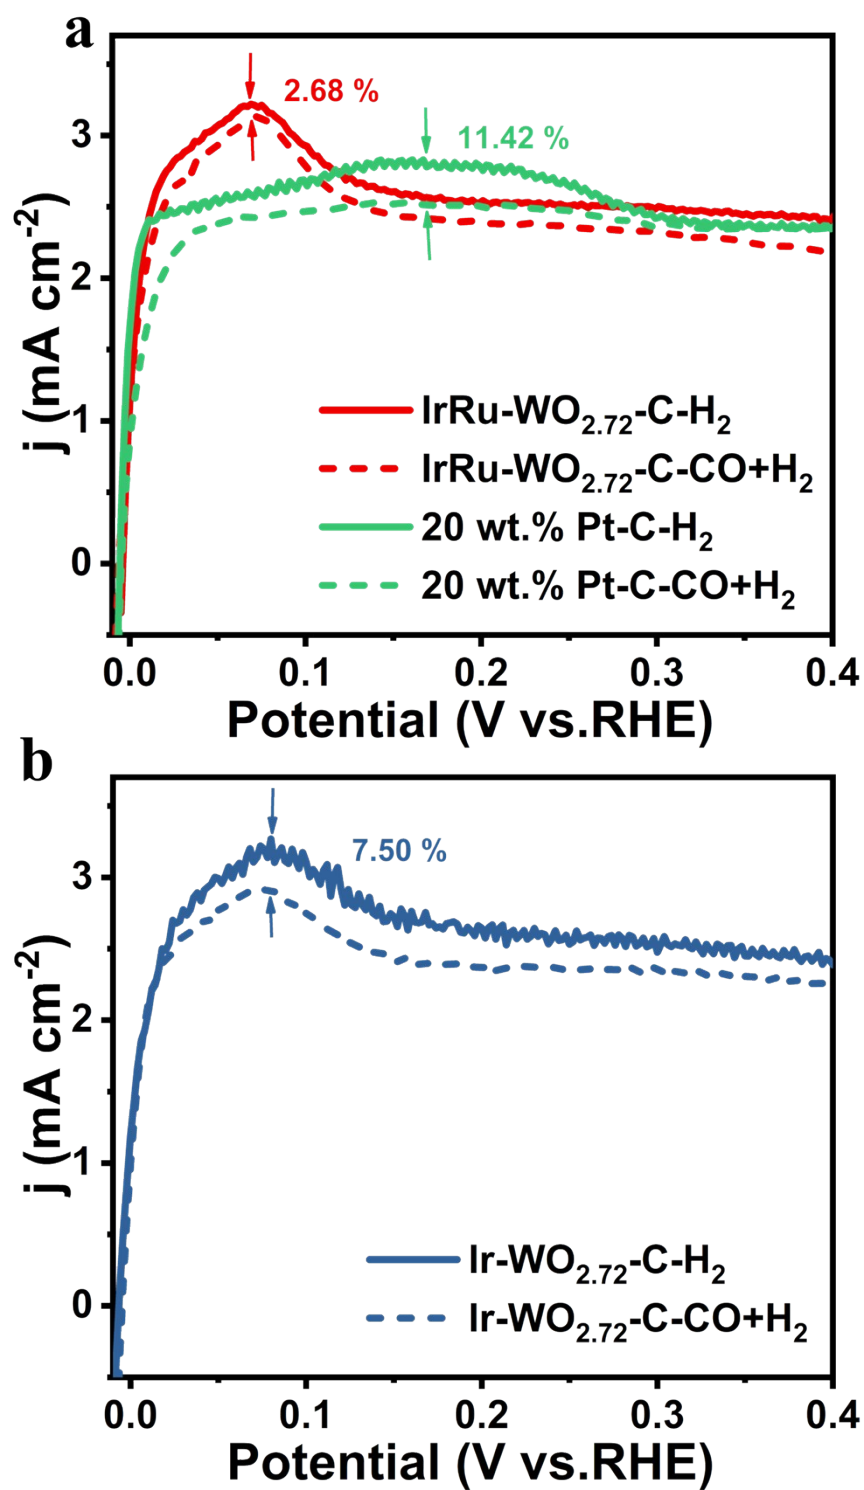

**Figure S25.** HOR polarization curves in H<sub>2</sub> and 1,000 ppm CO/H<sub>2</sub> saturated electrolytes for (a) 20 wt.% Pt/C, IrRu-WO<sub>2.72</sub>-C and (b) Ir-WO<sub>2.72</sub>-C.

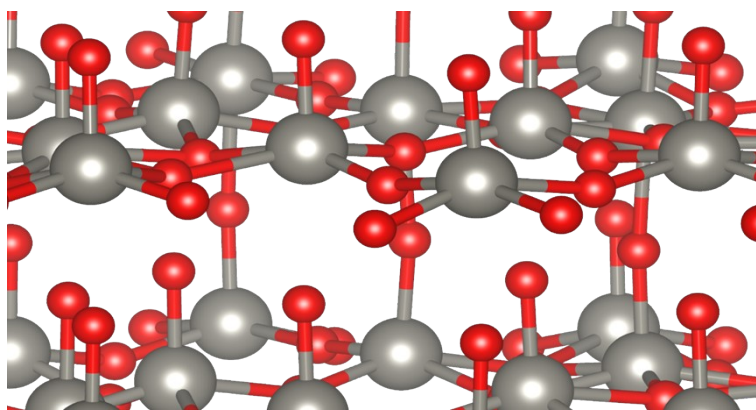

**Figure S26.** Side view of model structure for  $\text{WO}_{2.72}\text{-C}$ .

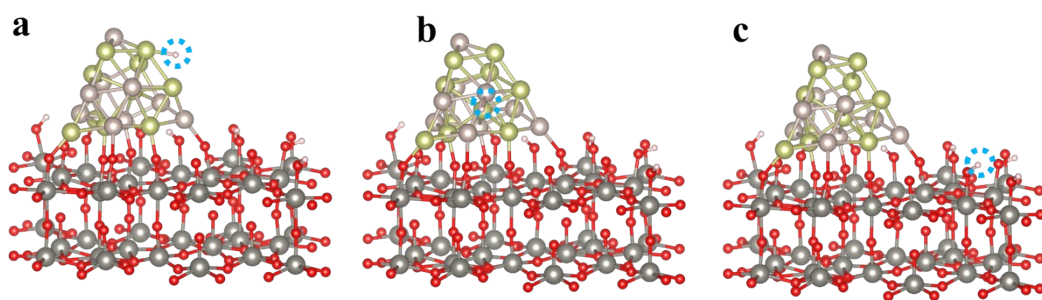

**Figure S27.** Side view of different H adsorption model structure on IrRu-WO<sub>2.72</sub>-C.

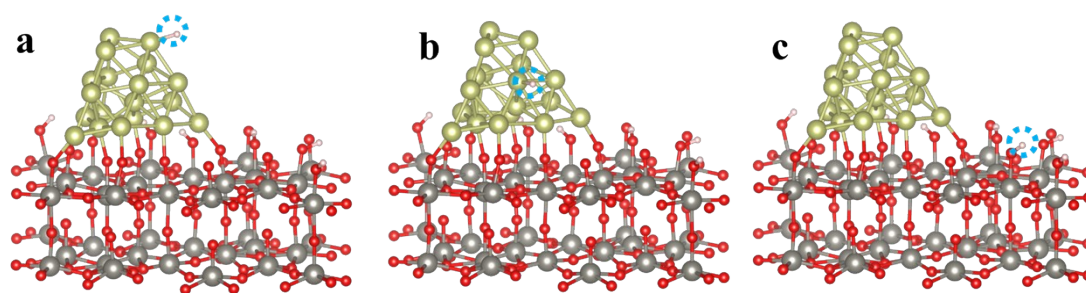

**Figure S28.** Side view of different H adsorption model structure on Ir-WO<sub>2.72</sub>-C.

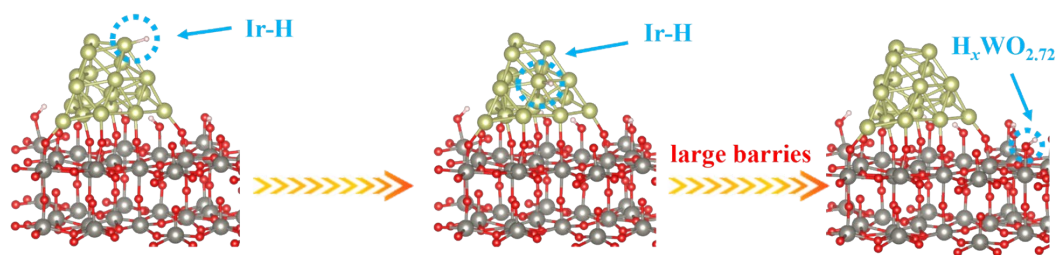

**Figure S29.** Schematic representation of the HOR mechanism and active hydrogen transfer pathway on the Ir-WO<sub>2.72</sub>-C surface.

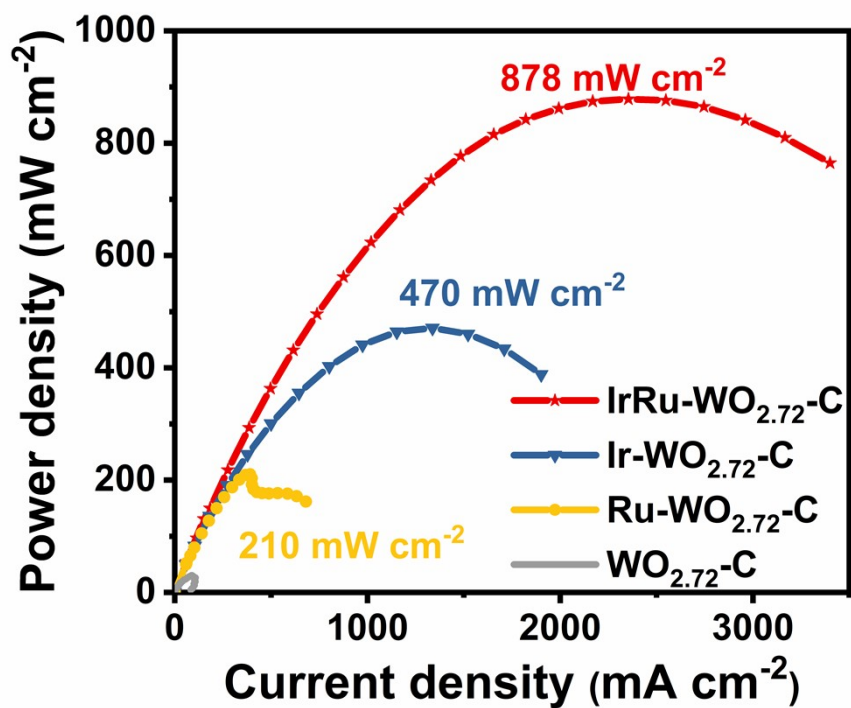

**Figure S30.** Power density curves of IrRu-WO<sub>2.72</sub>-C, Ir-WO<sub>2.72</sub>-C, Ru-WO<sub>2.72</sub>-C and WO<sub>2.72</sub>-C.

**Table S1.** The Ir and Ru loadings of samples tested by ICP-OES.

| Samples                    | Percentage of Ir (wt.%) | Percentage of Ru (wt.%) |
|----------------------------|-------------------------|-------------------------|
| IrRu-WO <sub>2.72</sub> -C | 1.19                    | 1.65                    |
| Ir-WO <sub>2.72</sub> -C   | 1.65                    | /                       |
| Ru-WO <sub>2.72</sub> -C   | /                       | 2.43                    |



**Table S2.** The electrical conductivity values of as-prepared catalysts.

| Samples                    | The electrical conductivity values (S cm <sup>-1</sup> ) |
|----------------------------|----------------------------------------------------------|
| WO <sub>3</sub>            | 1.30×10 <sup>-5</sup>                                    |
| IrRu-WO <sub>2.72</sub> -C | 9.29×10 <sup>-5</sup>                                    |
| WO <sub>2.72</sub> -C      | 0.22                                                     |
| IrRu-WO <sub>2.72</sub> -C | 2.41                                                     |

**Table S3.** HOR performances in acidic media in the latest reported literature.

| Catalyst                                         | HOR current density ( mA/cm <sup>2</sup> ) | The mass loading                            | Papers                                    |
|--------------------------------------------------|--------------------------------------------|---------------------------------------------|-------------------------------------------|
| Ru@TiO <sub>2</sub>                              | ~ 2.9                                      | 25.07 μg <sub>Ru</sub> cm <sup>-2</sup>     | Nat. Catal. <sup>1</sup>                  |
| IrP <sub>2</sub> -rGO                            | ~ 2.5                                      | 8.84 μg <sub>Ir</sub> cm <sup>-2</sup>      | ACS Appl. Mater. Interfaces <sup>2</sup>  |
| PdRu-WO <sub>x</sub> /C                          | ~ 3.1                                      | 49.44 μg <sub>Pd</sub> cm <sup>-2</sup>     | Catal. Today <sup>3</sup>                 |
| Ni <sub>x</sub> Mo <sub>1-x</sub> O <sub>2</sub> | ~ 0.95                                     | /                                           | ACS Energy Lett. <sup>4</sup>             |
| Rh-Rh <sub>2</sub> O <sub>3</sub> NPs/C          | ~3.3                                       | 10.20 μg <sub>Rh</sub> cm <sup>-2</sup>     | J. Mater. Chem. A <sup>5</sup>            |
| Ir <sub>NP</sub> @Ir <sub>SA</sub> -N-C          | ~2.7                                       | 5.61 μg <sub>Ir</sub> cm <sup>-2</sup>      | Angew. Chem., Int. Ed. <sup>6</sup>       |
| IrRu-N-C                                         | ~3.2                                       | 3.06 μg <sub>Ir</sub> cm <sup>-2</sup>      | Proc. Natl. Acad. Sci. U.S.A <sup>7</sup> |
| IrRu-WO <sub>2.72</sub> -C                       | ~3.35                                      | <b>5.41 μg<sub>Ir</sub> cm<sup>-2</sup></b> | <b>This work</b>                          |

**Table S4.** The performance comparison and corresponding catalyst loading.

| Catalyst                   | HOR current density<br>(mA cm <sup>-2</sup> ) | mass loading of<br>catalyst (mg cm <sup>-2</sup> ) | mass loading of precious<br>metal<br>( $\mu\text{g}_{\text{Ir/Pt}}$ cm <sup>-2</sup> ) |
|----------------------------|-----------------------------------------------|----------------------------------------------------|----------------------------------------------------------------------------------------|
| IrRu-WO <sub>2.72</sub> -C | ~3.35                                         | 0.51                                               | 5.41                                                                                   |
| Ir-WO <sub>2.72</sub> -C   | ~3.12                                         | 0.51                                               | 8.62                                                                                   |
| 20 wt.% Pt-C               | ~2.68                                         | 0.51                                               | 102.04                                                                                 |

## References:

- [1] Y.Y. Zhou, Z.Y. Xie, J.X. Jiang, J. Wang, X.Y. Song, Q. He, W. Ding, Z.D. Wei, *Nat. Catal.*, 2020, **3**, 454-462.
- [2] Z. Pu, T. Liu, W. Zhao, X. Shi, Y. Liu, G. Zhang, W. Hu, S. Sun, S. Liao, *ACS Appl. Mater. Interfaces*, 2020, **12**, 11737-11744.
- [3] K. Kwon, S.A. Jin, K.H. Lee, D.J. You, C. Pak, *Catal. Today*, 2014, **232**, 175-178.
- [4] H. Zeng, S. Chen, Y.Q. Jin, J. Li, J. Song, Z. Le, G. Liang, H. Zhang, F. Xie, J. Chen, Y. Jin, X. Chen, H. Meng, *ACS Energy Lett.*, 2020, **5**, 1908-1915.
- [5] M.K. Kundu, R. Mishra, T. Bhowmik, S. Barman, *J. Mater. Chem. A*, 2018, **6**, 23531-23541.
- [6] X. Yang, Y. Wang, X. Wang, B. Mei, E. Luo, Y. Li, Q. Meng, Z. Jin, Z. Jiang, C. Liu, J. Ge, W. Xing, *Angew. Chem. Int. Edit.*, 2021, **60**, 26177-26183.
- [7] X. Wang, Y. Li, Y. Wang, H. Zhang, Z. Jin, X. Yang, Z. Shi, L. Liang, Z. Wu, Z. Jiang, W. Zhang, C. Liu, W. Xing, J. Ge, *Proc Natl Acad Sci U S A*, 2021, **118**, e2107332118.
